# Supplementary material for: Ancylostoma ceylanicum, novel etiological agent for traveler’s diarrhea—report of four Japanese patients who returned from Southeast Asia and Papua New Guinea
Source: PubMed Central journal article supplement (PMC5848582; doi:10.1186/s41182-018-0087-8), 2018-03-13
Supplement: 41182_2018_87_MOESM1_ESM.pdf [file 41182_2018_87_MOESM1_ESM.pdf]

**Table S1 List of gene-specific primers used for PCR**

|                     | <b>Gene</b> | <b>Forward sequence</b> | <b>Reverse sequence</b>  |
|---------------------|-------------|-------------------------|--------------------------|
| <b>Case 1, 3, 4</b> | <i>COX1</i> | tttttgggcatcctgaggttat  | ctaacaacataataagtatcatg  |
|                     |             |                         |                          |
|                     | <i>COX1</i> | gtggttttggtaattgaatggtt | taaagaaagaacataatgaaaatg |
| <b>Case 2</b>       | <i>ITS*</i> | agaggtgaaattcgtggacc    | atatgcttaagttcagcgggt    |

\* the primer set was designed to amplify the gene of 18S rRNA, ITS1, 5.8S rRNA, ITS2 and 28S rRNA.
